# Supplementary material for: Ketone–enol tautomerism, polymorphism, mechanofluorochromism and solid-state acidochromism of isoquinolinone–arylidenehydrazine derivatives
Source: Royal Society of Chemistry journal article supplement (doi:10.1039/d1tc03063a), 2021-01-01
Supplement: d1tc03063a1.pdf [file d1tc03063a1.pdf]

## Electronic Supplementary Information

### **Ketone-enol tautomerism, polymorphism, mechanofluorochromism, and solid-state acidochromism of isoquinolinone-arylidenehydrazine derivatives**

Dan Wang,<sup>‡</sup> Xinyu Zhang,<sup>‡</sup> Xiangdong Han, Yunbing Zhou, Yunxiang Lei,\* Wenxia Gao, Miaochang Liu, Xiaobo Huang\* and Huayue Wu

College of Chemistry and Materials Engineering, Wenzhou University, Wenzhou, 325035, P. R. China

E-mail: yunxianglei@wzu.edu.cn (Y. Lei), xiaobhuang@wzu.edu.cn (X. Huang)

<sup>‡</sup> These authors contributed equally to this work

## Contents:

### 1. Experimental

#### 1.1 Measurements and materials

NMR spectra were obtained on a Bruker DRX 500 NMR spectrometer. High-resolution electrospray ionization (HRMS-ESI) mass spectra were conducted on a Hitachi Nano Frontier LD spectrometer. Melting points were performed with a WRS-1B digital melting point meter (uncorrected). Fluorescence spectra were performed with a HITACHI F-7000 fluorometer. Absolute fluorescence quantum yields ( $\Phi_F$ ) in solid state and time-resolved emission decay parameters were conducted on a FluoroMax-4 (Horiba Jobin Yvon) fluorometer. Absorption spectra were conducted on a UV-3600 Shimadzu spectrophotometer. X-Ray powder diffraction (XRD) patterns were conducted on an Empyrean X-ray diffraction instrument. Single-crystal X-ray diffraction measurements were obtained on a Bruker-Nonius Smart Apex CCD diffractometer with graphite monochromated Mo  $K\alpha$  radiation. Methyl piperidine-4-carboxylate, hydrazine hydrate, and various aromatic aldehydes were purchased from commercial suppliers and used directly.

#### Synthesis of methyl 1-(7-cyano-8-hydroxy-3,6-dimethylisoquinolin-1-yl)piperidine-4-carboxylate (2)

The mixture of compound **1** (2.0 g, 9.3 mmol), methyl piperidine-4-carboxylate (18 mmol), and  $\text{CH}_3\text{CN}$  (15 mL) was stirred at 90 °C for 5 h. After being cooled to the room temperature, the reaction mixture was filtered and concentrated under reduced pressure. The residue was purified by flash chromatography on silica gel to afford the corresponding product. White solid (2.9 g, 92% yield). M. p. 224.3-224.6 °C.  $^1\text{H}$  NMR ( $\text{CDCl}_3$ , 500 MHz):  $\delta$  15.65 (s, 1H), 7.21 (s, 1H), 6.93 (s, 1H), 3.73 (s, 3H), 3.26-3.24 (m, 4H), 2.58 (s, 3H), 2.56 (s, 3H), 2.23-2.20 (m, 2H), 2.07-1.99 (m, 3H) ppm.  $^{13}\text{C}$  NMR ( $\text{CDCl}_3$ , 125 MHz):  $\delta$  174.3, 163.3, 160.0, 154.0, 142.6, 141.9, 117.7, 116.0, 115.6, 109.3, 95.5, 51.9, 51.8, 40.4, 28.2, 23.9, 21.2 ppm. HRMS (ESI)  $m/z$ :  $[\text{M}+\text{H}]^+$  calculated for  $\text{C}_{19}\text{H}_{21}\text{N}_3\text{O}_3$ , 340.1656; found, 340.1653.

#### Synthesis of 1-hydrazinyl-3,6-dimethyl-8-oxo-2,8-dihydroisoquinoline-7-carbonitrile (3)

The mixture of compound **2** (2.5 g, 7.5 mmol), hydrazine hydrate (15 mL), and EtOH (15 mL) was stirred at 80 °C for 8 h. After being cooled to the room temperature, the mixture was poured in methanol (100 mL) to precipitate out the crude product. The crude product was washed with methanol five times and then dried to afford the pure target compound. Pale yellow solid (1.6 g, 96% yield). M. p. 344.5-344.9 °C.  $^1\text{H}$  NMR ( $\text{DMSO}-d_6$ , 500 MHz):  $\delta$  13.27 (s, 1H), 6.28 (d,  $J = 0.5$  Hz, 1H), 6.13 (s, 1H), 2.29 (d,  $J = 1.0$  Hz, 3H), 2.72 (s, 3H) ppm.  $^{13}\text{C}$  NMR ( $\text{CDCl}_3$ , 125 MHz):  $\delta$  174.6, 155.8, 148.0, 141.3, 138.9, 119.4, 107.6, 106.7, 104.7, 98.3, 21.0, 18.8 ppm. HRMS (ESI)  $m/z$ :  $[\text{M}+\text{H}]^+$  calculated for  $\text{C}_{12}\text{H}_{12}\text{N}_4\text{O}$ , 229.1084; found, 229.1080.

### Synthesis of the target compounds

General procedure: The mixture of compound **3** (1.5 g, 6.5 mmol), aromatic aldehyde (12 mmol), and DMF (15 mL) was stirred at 120 °C for 12 h. After being cooled to the room temperature, the mixture was poured into methanol (200 mL) and then stirred for 2 h to separate out the crude product. The crude product was washed by methanol three times and then dried to afford the pure target compound. Characterization data of the target compounds are listed as follows.

**(Z)-1-((E)-Benzylidenehydrazono)-8-hydroxy-3,6-dimethyl-1,2-dihydroisoquinoline-7-carbonitrile (BHIQ)**. Yellow-green solid (1.9 g, 93% yield). M. p. 231.3-231.6 °C. <sup>1</sup>H NMR (DMSO-*d*<sub>6</sub>, 500 MHz): δ 16.35 (s, 1H), 11.26 (s, 1H), 8.46 (s, 1H), 8.00-7.98 (m, 2H), 7.48-7.47 (m, 3H), 6.46 (s, 1H), 6.34 (s, 1H), 2.37 (s, 1H), 2.35 (s, 1H) ppm. <sup>13</sup>C NMR (CDCl<sub>3</sub>, 125 MHz): δ 169.3, 153.0, 151.7, 147.1, 141.1, 140.9, 134.2, 130.4, 128.6, 128.1, 117.3, 111.2, 107.0, 105.0, 97.0, 20.8, 19.2 ppm. HRMS (ESI) m/z: [M+H]<sup>+</sup> calculated for C<sub>19</sub>H<sub>16</sub>N<sub>4</sub>O, 317.1397; found, 317.1399.

**(Z)-8-Hydroxy-3,6-dimethyl-1-((E)-(naphthalen-2-ylmethylene)hydrazono)-1,2-dihydroisoquinoline-7-carbonitrile (NHIQ)**. Yellow-green solid (2.3 g, 96% yield). M. p. 277.5-278.1 °C. <sup>1</sup>H NMR (DMSO-*d*<sub>6</sub>, 500 MHz): δ 16.42 (s, 1H), 11.36 (s, 1H), 8.62 (s, 1H), 8.39 (dd, *J* = 9.0 Hz, 1.5 Hz, 2H), 8.25 (s, 1H), 8.00 (d, *J* = 9.0 Hz, 1H), 7.97 (dd, *J* = 9.0 Hz, 6.5 Hz, 2H), 7.60-7.56 (m, 2H), 6.52 (s, 1H), 6.39 (s, 1H), 2.41 (s, 3H), 2.38 (s, 3H) ppm. <sup>13</sup>C NMR (CDCl<sub>3</sub>, 125 MHz): δ 169.4, 153.0, 151.6, 147.1, 141.2, 141.0, 134.0, 132.8, 132.1, 129.8, 128.4, 128.1, 127.8, 127.3, 126.8, 123.8, 117.5, 111.3, 107.1, 105.1, 97.0, 20.9, 19.3 ppm. HRMS (ESI) m/z: [M+H]<sup>+</sup> calculated for C<sub>23</sub>H<sub>18</sub>N<sub>4</sub>O, 367.1554; found, 367.1549.

**(Z)-1-((E)-(Anthracen-9-ylmethylene)hydrazono)-8-hydroxy-3,6-dimethyl-1,2-dihydroisoquinoline-7-carbonitrile (AHIQ)**. Orange solid (2.4 g, 90% yield). M. p. 288.3-288.7 °C. <sup>1</sup>H NMR (DMSO-*d*<sub>6</sub>, 500 MHz): δ 16.55 (s, 1H), 11.54 (s, 1H), 9.63 (s, 1H), 8.74 (s, 1H), 8.63 (d, *J* = 8.5 Hz, 2H), 8.16 (d, *J* = 7.5 Hz, 2H), 7.64-7.58 (m, 4H), 6.53 (s, 1H), 6.40 (s, 1H), 2.40 (s, 3H), 2.28 (s, 3H) ppm. <sup>13</sup>C NMR (DMSO-*d*<sub>6</sub>, 125 MHz): δ 169.6, 153.1, 150.8, 147.1, 141.3, 141.1, 130.8, 129.8, 129.3, 128.7, 127.0, 126.1, 125.6, 125.4, 117.6, 111.2, 107.2, 105.0, 97.0, 20.9, 19.1. HRMS (ESI) m/z: [M+H]<sup>+</sup> calculated for C<sub>27</sub>H<sub>20</sub>N<sub>4</sub>O, 417.1710; found, 417.1713.

**(E)-1-(2-(4-(Diphenylamino)benzylidene)hydrazineyl)-3,6-dimethyl-8-oxo-2,8-dihydroisoquinoline-7-carbonitrile (TPHIQ)**. Yellow-green solid (2.9 g, 94% yield). M. p. 275.1-275.6 °C. <sup>1</sup>H NMR (CDCl<sub>3</sub>, 400 MHz): δ 15.37 (s, 1H), 9.24 (s, 1H), 8.20 (s, 1H), 7.57 (d, *J* = 8.8 Hz, 2H), 7.32-7.28 (m, 4H), 7.15-7.08 (m, 6H), 7.04 (d, *J* = 8.4 Hz, 1H), 6.44 (s, 1H), 5.99 (s, 1H), 2.45 (s, 3H), 2.29 (s, 3H) ppm. <sup>13</sup>C NMR (CDCl<sub>3</sub>, 125 MHz): δ 166.3, 153.5, 152.8, 150.2, 146.9, 146.7, 140.6, 138.5, 129.5, 128.9, 127.1, 125.4, 124.1, 121.7, 116.4, 114.1, 106.2, 105.1, 98.0, 21.2, 19.6 ppm. HRMS (ESI) m/z: [M+H]<sup>+</sup> calculated for C<sub>31</sub>H<sub>25</sub>N<sub>5</sub>O, 484.2132; found, 484.2134.

## 2. Figures and tables

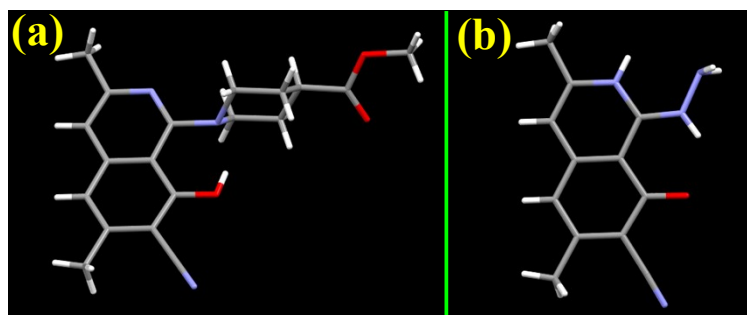

Fig. S1 Crystal structures of compound **2** (a) and compound **3** (b).

**Table S1** Crystal data and details of collection and refinement for intermediates **2** and **3**.

| Compound                                                    | <b>2</b>                                                      | <b>3</b>                                                        |
|-------------------------------------------------------------|---------------------------------------------------------------|-----------------------------------------------------------------|
| CCDC (no.)                                                  | 2091622                                                       | 2091623                                                         |
| Empirical formula                                           | C <sub>19</sub> H <sub>21</sub> N <sub>3</sub> O <sub>3</sub> | C <sub>14</sub> H <sub>18</sub> N <sub>4</sub> O <sub>2</sub> S |
| Formula weight                                              | 339.39                                                        | 306.38                                                          |
| Temperature (K)                                             | 293(2)                                                        | 294(2)                                                          |
| Crystal system                                              | Triclinic                                                     | Monoclinic                                                      |
| Space group                                                 | <i>P</i> $\bar{1}$                                            | <i>P</i> 2(1)/c                                                 |
| <i>Z</i>                                                    | 2                                                             | 4                                                               |
| <i>D</i> <sub>calcd</sub> [Mg/m <sup>3</sup> ]              | 1.280                                                         | 1.358                                                           |
| <i>F</i> (000)                                              | 1.023                                                         | 648                                                             |
| $\theta$ range [°]                                          | 2.305-25.992                                                  | 2.113 -25.998                                                   |
| <i>R</i> <sub>1</sub> [ <i>I</i> >2 $\sigma$ ( <i>I</i> )]  | 0.0530                                                        | 0.0484                                                          |
| <i>wR</i> <sub>2</sub> [ <i>I</i> >2 $\sigma$ ( <i>I</i> )] | 0.1313                                                        | 0.1185                                                          |
| <i>a</i> [Å]                                                | 9.084(6)                                                      | 13.6700(7)                                                      |
| <i>b</i> [Å]                                                | 9.380(5)                                                      | 13.8069(5)                                                      |
| <i>c</i> [Å]                                                | 11.255(6)                                                     | 8.0610(3)                                                       |
| $\alpha$ [deg]                                              | 77.947(17)                                                    | 90                                                              |
| $\beta$ [deg]                                               | 76.979(19)                                                    | 99.975(2)                                                       |
| $\gamma$ [deg]                                              | 72.387(18)                                                    | 90                                                              |
| <i>V</i> [Å <sup>3</sup> ]                                  | 880.3(8)                                                      | 1498.44(11)                                                     |
| GOF                                                         | 1.023                                                         | 1.026                                                           |
| <i>R</i> (int)                                              | 0.0603                                                        | 0.0227                                                          |
| No. of reflcns collected                                    | 12556                                                         | 7292                                                            |
| No. of unique reflcns                                       | 3452                                                          | 2900                                                            |
| <i>R</i> <sub>1</sub> (all data)                            | 0.0861                                                        | 0.0620                                                          |
| <i>wR</i> <sub>2</sub> (all data)                           | 0.1568                                                        | 0.1314                                                          |

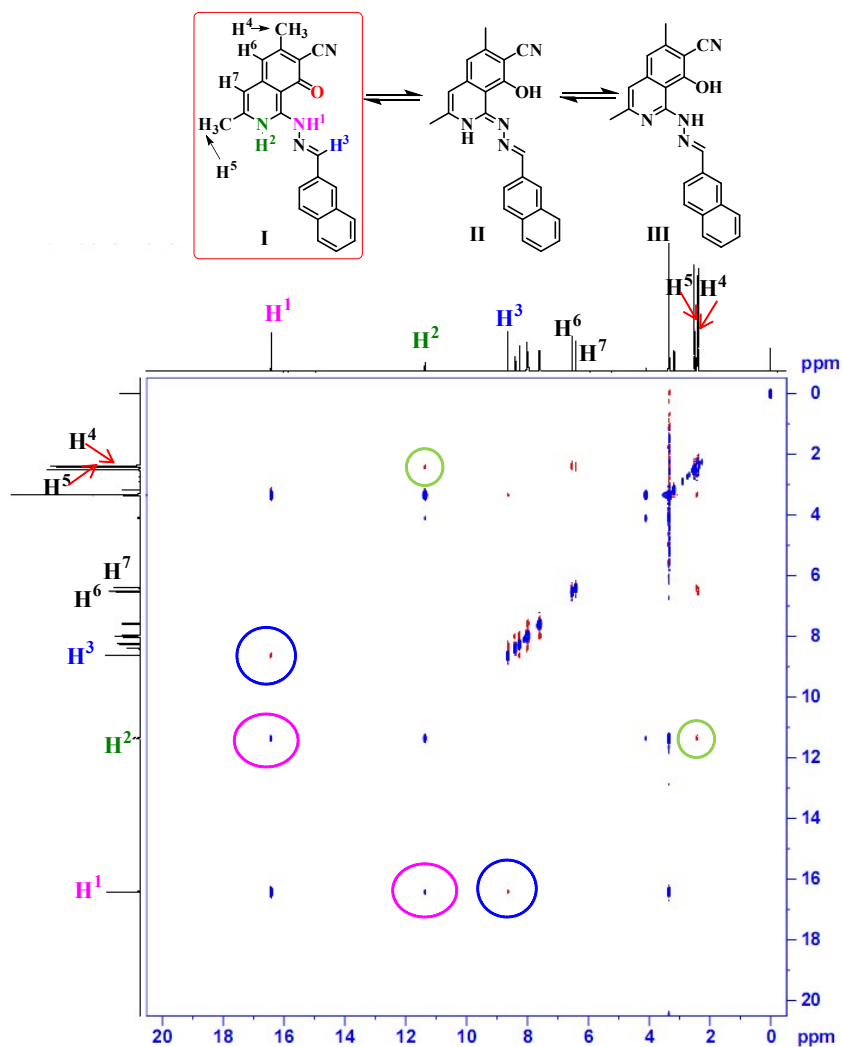

Fig. S2 NOESY spectrum of NHIQ in DMSO- $d_6$ .

**Table S2** Absolute Energy (Hartree) of different structural forms of the target compounds under the environment of chloroform.

| Compound | Absolute Energy (Hartree) |              |              |
|----------|---------------------------|--------------|--------------|
|          | Form-I                    | Form-II      | Form-III     |
| AHIQ     | -1335.540875              | -1335.540143 | -1335.475019 |
| BHIQ     | -1028.193731              | -1028.192836 | -1028.137098 |
| NHIQ     | -1181.877371              | -1181.876459 | -1181.815842 |
| TPHIQ    | -1545.783189              | -1545.781810 | -1545.712879 |

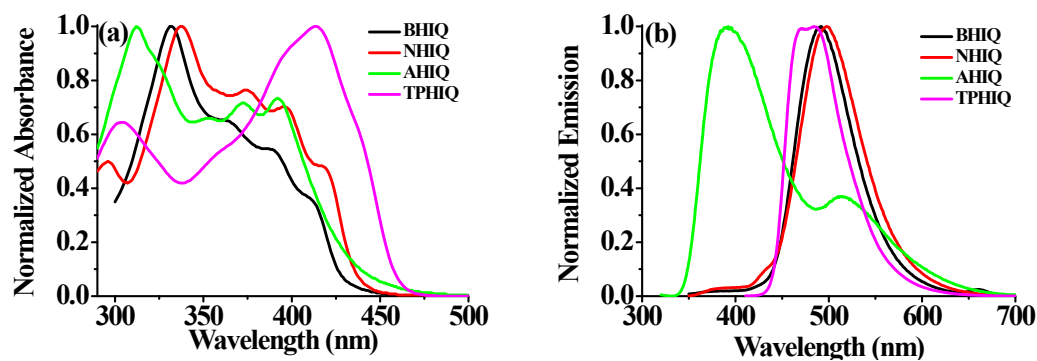

Fig. S3 Normalized absorption (a) and fluorescence (b) spectra of the isoquinoline-arylidenehydrazine derivatives in  $\text{CHCl}_3$  at a concentration of  $1 \times 10^{-5}$  mol/L.

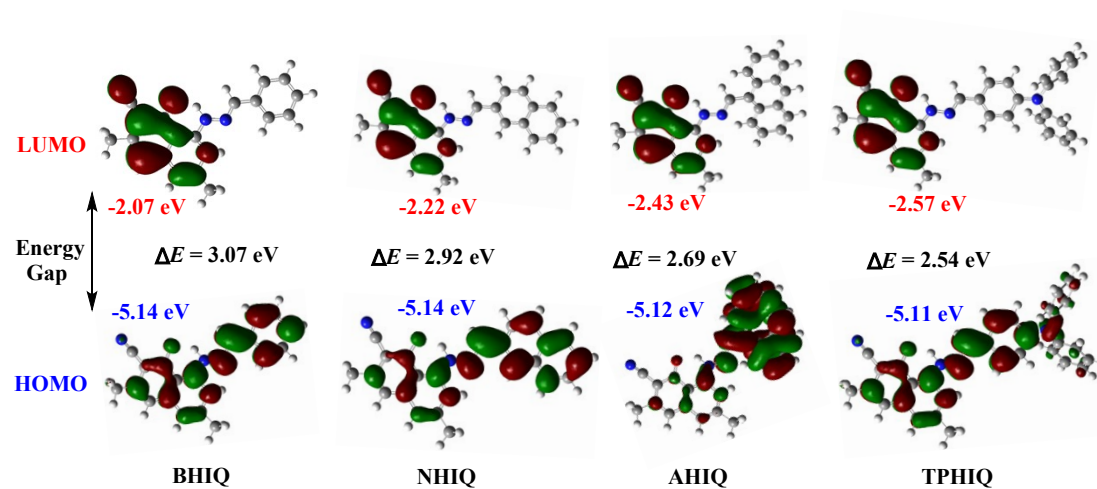

Fig. S4 HOMO and LUMO distributions and energy gaps ( $\Delta E$ ) of isoquinoline-arylidenehydrazine derivatives obtained from DFT calculations.

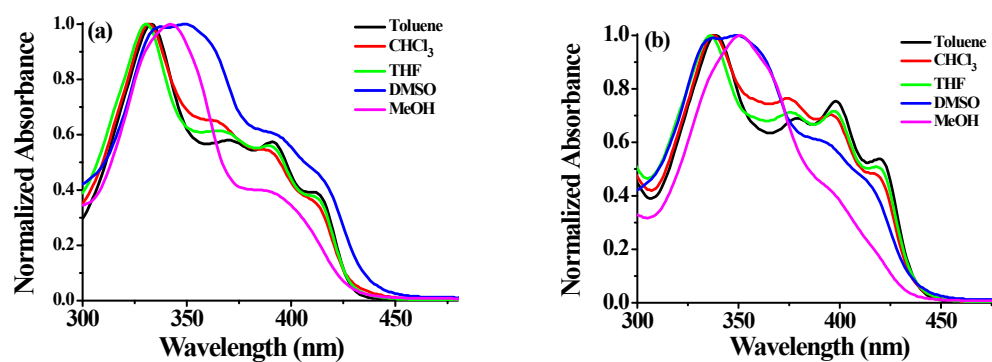

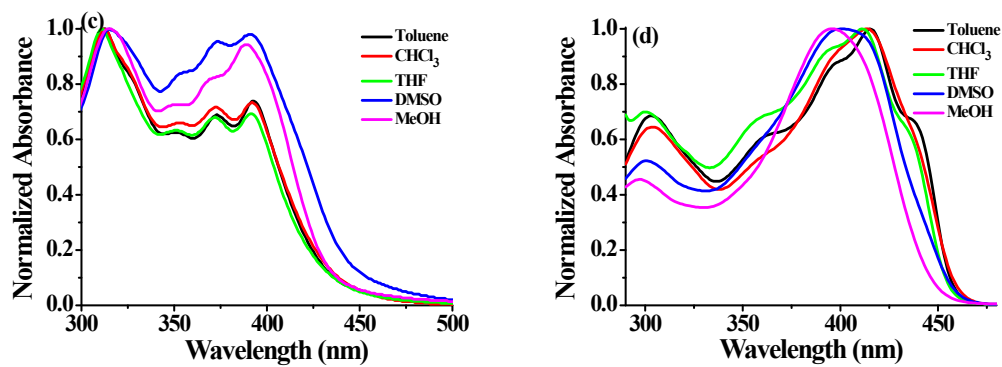

Fig. S5 Normalized absorption spectra of **BHIQ** (a), **NHIQ** (b), **AHIQ** (c), and **TPHIQ** (d) in various solvents. Concentration:  $1 \times 10^{-5}$  mol/L.

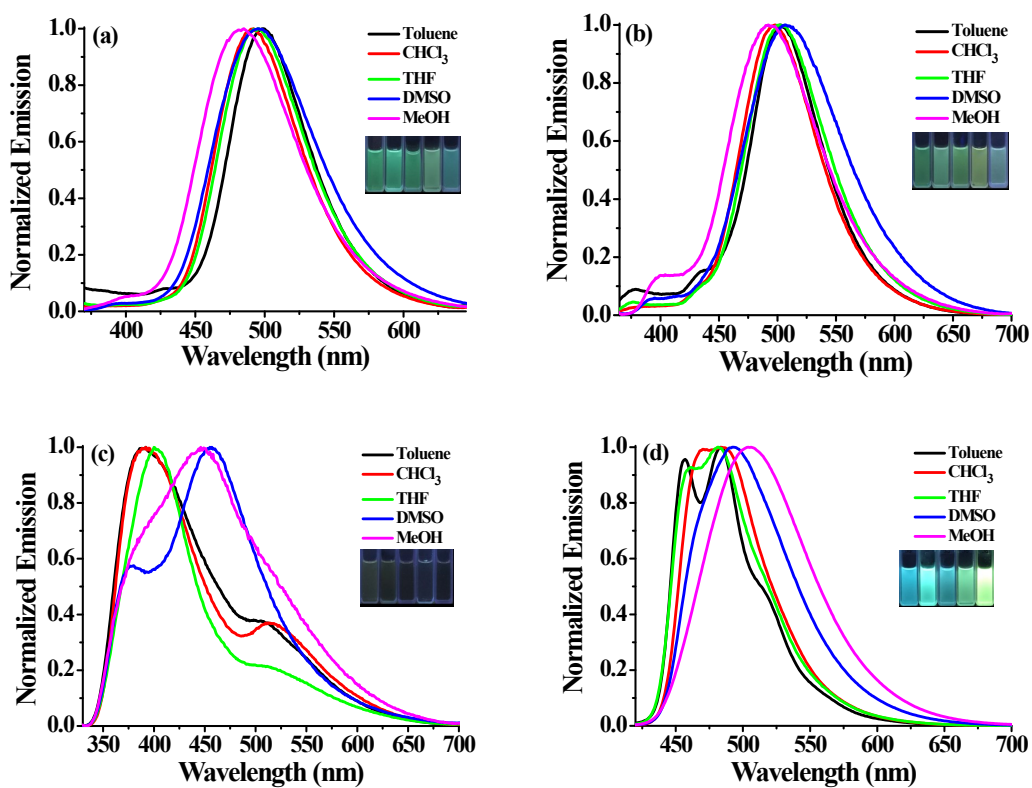

Fig. S6 Normalized fluorescence spectra of **BHIQ** (a), **NHIQ** (b), **AHIQ** (c), and **TPHIQ** (d) in various solvents. Inset: Fluorescence photos in different solvents and the solvent from left to right is toluene,  $\text{CHCl}_3$ , THF, DMSO, and  $\text{CH}_3\text{OH}$ . Concentration:  $1 \times 10^{-5}$  mol/L.

**Table S3** Crystal data and details of collection and refinement for the target compounds.

| Compound                                                    | <b>BHIQ-g</b>                                                                 | <b>BHIQ-ms</b>                                                | <b>BHIQ-ms<sup>1a</sup></b>                                   | <b>NHIQ-sb</b>                                                | <b>NHIQ-g</b>                                    |
|-------------------------------------------------------------|-------------------------------------------------------------------------------|---------------------------------------------------------------|---------------------------------------------------------------|---------------------------------------------------------------|--------------------------------------------------|
| CCDC (no.)                                                  | 2091614                                                                       | 2091615                                                       | -                                                             | 2091617                                                       | 2091616                                          |
| Empirical formula                                           | C <sub>39</sub> H <sub>34</sub> Cl <sub>2</sub> N <sub>8</sub> O <sub>2</sub> | C <sub>19</sub> H <sub>18</sub> N <sub>4</sub> O <sub>2</sub> | C <sub>19</sub> H <sub>18</sub> N <sub>4</sub> O <sub>2</sub> | C <sub>23</sub> H <sub>22</sub> N <sub>4</sub> O <sub>3</sub> | C <sub>23</sub> H <sub>18</sub> N <sub>4</sub> O |
| Formula weight                                              | 717.64                                                                        | 334.37                                                        | 334.37                                                        | 402.44                                                        | 366.41                                           |
| Temperature (K)                                             | 293(2)                                                                        | 190(2)                                                        | 293(2)                                                        | 193(2)                                                        | 190(2)                                           |
| Crystal system                                              | Monoclinic                                                                    | Monoclinic                                                    | Monoclinic                                                    | Triclinic                                                     | Monoclinic                                       |
| Space group                                                 | <i>P</i> 2(1)/ <i>c</i>                                                       | <i>P</i> 2(1)/ <i>c</i>                                       | <i>P</i> 2(1)/ <i>c</i>                                       | <i>P</i> $\bar{1}$                                            | <i>P</i> 2(1)/ <i>c</i>                          |
| <i>Z</i>                                                    | 4                                                                             | 4                                                             | 4                                                             | 4                                                             | 8                                                |
| <i>D</i> <sub>calcd</sub> [Mg/m <sup>3</sup> ]              | 1.303                                                                         | 1.338                                                         | 1.309                                                         | 1.286                                                         | 1.255                                            |
| <i>F</i> (000)                                              | 1496                                                                          | 704                                                           | 704                                                           | 848                                                           | 1536                                             |
| $\theta$ range [°]                                          | 2.551-25.500                                                                  | 5.44-53.83                                                    | 2.847-25.997                                                  | 1.962-24.999                                                  | 2.315-54.106                                     |
| <i>R</i> <sub>1</sub> [ <i>I</i> >2 $\sigma$ ( <i>I</i> )]  | 0.0678                                                                        | 0.0370                                                        | 0.0426                                                        | 0.0909                                                        | 0.0677                                           |
| <i>wR</i> <sub>2</sub> [ <i>I</i> >2 $\sigma$ ( <i>I</i> )] | 0.1327                                                                        | 0.1023                                                        | 0.1061                                                        | 0.2588                                                        | 0.1346                                           |
| <i>a</i> [Å]                                                | 7.1128(8)                                                                     | 9.2319(3)                                                     | 9.2933(3)                                                     | 6.8893(10)                                                    | 9.3230(5)                                        |
| <i>b</i> [Å]                                                | 24.249(3)                                                                     | 7.4023(2)                                                     | 7.4829(3)                                                     | 10.2811(14)                                                   | 33.211(2)                                        |
| <i>c</i> [Å]                                                | 21.338(2)                                                                     | 24.3921(8)                                                    | 24.4887(9)                                                    | 31.330(4)                                                     | 12.8183(7)                                       |
| $\alpha$ [deg]                                              | 90                                                                            | 90                                                            | 90                                                            | 89.906(4)                                                     | 90                                               |
| $\beta$ [deg]                                               | 96.157(4)                                                                     | 95.2650(10)                                                   | 95.1110(10)                                                   | 84.037(4)                                                     | 102.176(3)                                       |
| $\gamma$ [deg]                                              | 90                                                                            | 90                                                            | 90                                                            | 70.494(4)                                                     | 90                                               |
| <i>V</i> [Å <sup>3</sup> ]                                  | 3659.2(7)                                                                     | 1659.86(9)                                                    | 1696.19(11)                                                   | 2079.1(5)                                                     | 3879.6(4)                                        |
| GOF                                                         | 1.049                                                                         | 0.950                                                         | 1.038                                                         | 1.063                                                         | 0.934                                            |
| <i>R</i> (int)                                              | 0.0964                                                                        | 0.0474                                                        | 0.0334                                                        | 0.0685                                                        | 0.0553                                           |
| No. of reflns collected                                     | 52601                                                                         | 3021                                                          | 16722                                                         | 33258                                                         | 6830                                             |
| No. of unique reflns                                        | 6817                                                                          | 2588                                                          | 3335                                                          | 7302                                                          | 2863                                             |
| <i>R</i> <sub>1</sub> (all data)                            | 0.1541                                                                        | 0.0483                                                        | 0.0632                                                        | 0.1408                                                        | 0.1538                                           |
| <i>wR</i> <sub>2</sub> (all data)                           | 0.1766                                                                        | 0.1085                                                        | 0.1227                                                        | 0.3223                                                        | 0.1622                                           |

  

| Compound                                                    | <b>AHIQ-o</b>                                    | <b>AHIQ-r</b>                                    | <b>TPHIQ</b>                                                  | <b>TPHIQ-TFA</b>                                                             |
|-------------------------------------------------------------|--------------------------------------------------|--------------------------------------------------|---------------------------------------------------------------|------------------------------------------------------------------------------|
| CCDC (no.)                                                  | 2091619                                          | 2091618                                          | 2091620                                                       | 2091621                                                                      |
| Empirical formula                                           | C <sub>27</sub> H <sub>20</sub> N <sub>4</sub> O | C <sub>27</sub> H <sub>20</sub> N <sub>4</sub> O | C <sub>31</sub> H <sub>31</sub> N <sub>5</sub> O <sub>4</sub> | C <sub>35</sub> H <sub>27</sub> F <sub>6</sub> N <sub>5</sub> O <sub>5</sub> |
| Formula weight                                              | 416.47                                           | 416.47                                           | 537.61                                                        | 711.61                                                                       |
| Temperature (K)                                             | 293(2)                                           | 293(2)                                           | 193(2)                                                        | 293(2)                                                                       |
| Crystal system                                              | Triclinic                                        | Monoclinic                                       | Orthorhombic                                                  | Triclinic                                                                    |
| Space group                                                 | <i>P</i> $\bar{1}$                               | <i>P</i> 2(1)/ <i>c</i>                          | <i>P</i> <i>c</i> a 21                                        | <i>P</i> $\bar{1}$                                                           |
| <i>Z</i>                                                    | 2                                                | 4                                                | 4                                                             | 2                                                                            |
| <i>D</i> <sub>calcd</sub> [Mg/m <sup>3</sup> ]              | 1.328                                            | 1.356                                            | 1.294                                                         | 1.395                                                                        |
| <i>F</i> (000)                                              | 436                                              | 872                                              | 1136                                                          | 732                                                                          |
| $\theta$ range [°]                                          | 2.596 -26.000                                    | 2.525-25.498                                     | 2.375-25.496                                                  | 2.225-25.500                                                                 |
| <i>R</i> <sub>1</sub> [ <i>I</i> >2 $\sigma$ ( <i>I</i> )]  | 0.0450                                           | 0.0611                                           | 0.0581                                                        | 0.0598                                                                       |
| <i>wR</i> <sub>2</sub> [ <i>I</i> >2 $\sigma$ ( <i>I</i> )] | 0.1125                                           | 0.1356                                           | 0.1155                                                        | 0.1454                                                                       |
| <i>a</i> [Å]                                                | 9.8422(4)                                        | 10.4452(13)                                      | 21.928(2)                                                     | 11.2227(8)                                                                   |
| <i>b</i> [Å]                                                | 9.9010(3)                                        | 14.5388(17)                                      | 18.6382(14)                                                   | 11.5198(9)                                                                   |
| <i>c</i> [Å]                                                | 12.4255(4)                                       | 14.352(2)                                        | 6.7530(5)                                                     | 13.9598(12)                                                                  |
| $\alpha$ [deg]                                              | 74.2740(10)                                      | 90                                               | 90                                                            | 95.662(3)                                                                    |



|                          |             |            |           |            |
|--------------------------|-------------|------------|-----------|------------|
| $\beta$ [deg]            | 78.7650(10) | 110.632(4) | 90        | 96.684(2)  |
| $\gamma$ [deg]           | 63.7490(10) | 90         | 90        | 107.307(2) |
| $V$ [Å <sup>3</sup> ]    | 1041.36(6)  | 2039.8(5)  | 2760.0(4) | 1694.4(2)  |
| GOF                      | 1.022       | 1.053      | 1.078     | 1.010      |
| $R$ (int)                | 0.0342      | 0.0592     | 0.0477    | 0.0745     |
| No. of reflens collected | 17859       | 9391       | 12704     | 29491      |
| No. of unique reflens    | 4066        | 3775       | 4819      | 6273       |
| $R_1$ (all data)         | 0.0647      | 0.1213     | 0.0881    | 0.0975     |
| $wR_2$ (all data)        | 0.1289      | 0.1758     | 0.1319    | 0.1732     |

<sup>a</sup> **BHIQ-*ms'*** was obtained from **BHIQ-*ms*** a week later in natural environment.

**Table S4** The fluorescence properties and lifetime decays parameters of the target compounds under different conditions.

| Compound                | Type            | $\lambda_{em}$ | $\Phi_F$ | $\tau_1^a$ | $A_1^b$ | $\tau_2^a$ | $A_2^b$ | $\langle\tau\rangle^c$ | $k_f^d$            | $k_{nr}^e$         |
|-------------------------|-----------------|----------------|----------|------------|---------|------------|---------|------------------------|--------------------|--------------------|
|                         |                 | (nm)           | (%)      | (ns)       | (%)     | (ns)       | (%)     | (ns)                   | (s <sup>-1</sup> ) | (s <sup>-1</sup> ) |
| <b>BHIQ-<i>g</i></b>    | Original        | 504            | 15       | 1.51       | 73      | 5.86       | 27      | 2.70                   | $5.6 \times 10^7$  | $3.1 \times 10^8$  |
|                         | Ground          | 502            | 7        | 0.53       | 49      | 18.9       | 51      | 9.88                   | $7.1 \times 10^6$  | $9.4 \times 10^7$  |
|                         | Fumed           | 479            | 14       | 0.04       | 74      | 14.3       | 26      | 3.75                   | $3.7 \times 10^7$  | $2.3 \times 10^8$  |
| <b>BHIQ-<i>ms</i></b>   | Original        | 485            | 12       | 0.13       | 57      | 8.64       | 43      | 3.79                   | $3.1 \times 10^7$  | $2.3 \times 10^8$  |
|                         | Gently ground   | 480            | 21       | 0.49       | 77      | 5.45       | 23      | 1.64                   | $1.3 \times 10^8$  | $4.8 \times 10^8$  |
|                         | Strongly ground | 491            | 10       | 0.11       | 59      | 8.48       | 41      | 3.54                   | $2.8 \times 10^7$  | $2.5 \times 10^8$  |
|                         | Fumed           | 480            | 12       | 0.63       | 76      | 8.31       | 24      | 2.46                   | $4.8 \times 10^7$  | $3.6 \times 10^8$  |
| <b>BHIQ<sup>f</sup></b> | TFA             | 437, 455       | 18       | 0.43       | 87      | 2.57       | 13      | 0.71                   | $2.5 \times 10^8$  | $1.2 \times 10^9$  |
|                         | TEA             | 487            | 11       | 0.24       | 75      | 3.79       | 25      | 1.13                   | $9.7 \times 10^7$  | $7.8 \times 10^8$  |
| <b>NHIQ-<i>sb</i></b>   | Original        | 481            | 9        | 0.60       | 79      | 4.27       | 21      | 1.37                   | $6.6 \times 10^7$  | $6.6 \times 10^8$  |
|                         | Ground          | 515            | 4        | 0.55       | 44      | 9.75       | 56      | 5.71                   | $7.0 \times 10^6$  | $1.7 \times 10^8$  |
|                         | Fumed           | 482            | 9        | 0.34       | 71      | 4.34       | 29      | 1.52                   | $6.0 \times 10^7$  | $6.0 \times 10^8$  |
| <b>NHIQ-<i>g</i></b>    | Original        | 503            | 15       | 1.13       | 75      | 4.65       | 25      | 2.02                   | $7.4 \times 10^7$  | $4.2 \times 10^8$  |
|                         | Ground          | 512            | 5        | 0.69       | 49      | 9.23       | 51      | 5.07                   | $1.0 \times 10^7$  | $1.9 \times 10^8$  |
|                         | Fumed           | 504            | 11       | 0.34       | 70      | 4.79       | 30      | 1.66                   | $6.6 \times 10^7$  | $5.4 \times 10^8$  |
| <b>NHIQ<sup>g</sup></b> | TFA             | 459, 528       | 24       | 4.73       | 66      | 1.70       | 34      | 3.69                   | $6.5 \times 10^7$  | $2.1 \times 10^8$  |
|                         | TEA             | 492            | 9        | 4.36       | 21      | 0.19       | 79      | 1.06                   | $8.5 \times 10^7$  | $8.6 \times 10^8$  |
| <b>AHIQ-<i>r</i></b>    | Original        | 578, 625       | 6        | 0.3        | 56      | 8.02       | 44      | 3.69                   | $1.6 \times 10^7$  | $2.5 \times 10^8$  |
|                         | Ground          | 580, 624       | 8        | 0.12       | 73      | 11.2       | 27      | 3.13                   | $2.6 \times 10^7$  | $2.9 \times 10^8$  |
| <b>AHIQ-<i>o</i></b>    | Original        | 567            | 10       | 8.89       | 15      | 0.83       | 85      | 2.04                   | $5.0 \times 10^7$  | $4.4 \times 10^8$  |
|                         | Ground          | 559            | 8        | 26.4       | 13      | 1.06       | 87      | 1.01                   | $7.9 \times 10^7$  | $9.1 \times 10^8$  |

|                         |          |          |    |      |    |      |    |      |                   |                   |
|-------------------------|----------|----------|----|------|----|------|----|------|-------------------|-------------------|
|                         | Fumed    | 566      | 13 | 15.7 | 16 | 0.74 | 84 | 3.13 | $4.2 \times 10^7$ | $2.8 \times 10^8$ |
| <b>AHIQ<sup>b</sup></b> | TFA      | 543, 577 | 10 | 0.33 | 86 | 9.18 | 14 | 1.57 | $6.4 \times 10^7$ | $5.7 \times 10^8$ |
|                         | TEA      | 583      | 9  | 8.07 | 6  | 0.04 | 94 | 0.52 | $1.7 \times 10^8$ | $1.8 \times 10^9$ |
| <b>TPHIQ</b>            | Original | 519      | 8  | 15.3 | 39 | 0.39 | 61 | 6.20 | $1.3 \times 10^7$ | $1.5 \times 10^8$ |
|                         | Ground   | 513      | 6  | 5.23 | 21 | 0.33 | 79 | 1.36 | $4.4 \times 10^7$ | $6.9 \times 10^8$ |
|                         | TFA      | 542, 620 | 7  | 12.9 | 14 | 0.49 | 86 | 3.16 | $2.2 \times 10^7$ | $2.9 \times 10^8$ |
|                         | TEA      | 519      | 6  | 0.12 | 64 | 4.8  | 36 | 1.80 | $3.3 \times 10^7$ | $5.2 \times 10^8$ |

<sup>a</sup>  $\tau_1$  and  $\tau_2$  are the lifetimes of the shorter-lived and longer-lived species, respectively. <sup>b</sup>  $A_1$  and  $A_2$  are the amplitudes of the shorter-lived and longer-lived species, respectively. <sup>c</sup> Weighted mean lifetime  $\langle\tau\rangle$  obtained from the equation:  $\langle\tau\rangle = (A_1\tau_1 + A_2\tau_2)/(A_1 + A_2)$ . <sup>d</sup> Radiative rate constant  $k_r$  obtained from the equation:  $k_r = \Phi_F/\langle\tau\rangle$ . <sup>e</sup> Non-radiative rate constant  $k_{nr}$  obtained from the equation:  $k_{nr} = (1 - \Phi_F)/\langle\tau\rangle$ . <sup>f</sup> **BHIQ-g** or **BHIQ-ms**. <sup>g</sup> **NHIQ-sb** or **NHIQ-g**. <sup>h</sup> **AHIQ-r** or **AHIQ-o**.

**Table S5** Summarization of the interactions in the single crystals of the target compounds.

| Crystal       | Interactions                      | d/Å   | Crystal         | Interactions                      | d/Å   |
|---------------|-----------------------------------|-------|-----------------|-----------------------------------|-------|
| <b>BHIQ-g</b> | H11 $\cdots\pi$ (Ph)              | 3.638 | <b>BHIQ-ms</b>  | $\pi$ (Ph) $\cdots\pi$ (C=N)      | 3.386 |
|               | $\pi$ (Ph) $\cdots\pi$ (C=N)      | 3.413 |                 | $\pi$ (C=N) $\cdots\pi$ (C=O)     | 3.494 |
|               | $\pi$ (Ph) $\cdots\pi$ (C=N)      | 3.553 |                 | N2-H2A $\cdots$ O1                | 1.839 |
|               | O2-H2A $\cdots$ N7                | 1.762 |                 | H2 $\cdots$ O1                    | 2.473 |
|               | O1-H1A $\cdots$ N3                | 1.807 |                 |                                   |       |
|               | N5-H5 $\cdots$ N2                 | 2.303 |                 |                                   |       |
|               | H38 $\cdots$ N2                   | 2.695 |                 |                                   |       |
|               | H37 $\cdots$ O1                   | 2.641 |                 |                                   |       |
| <b>NHIQ-g</b> | H18A $\cdots\pi$ (C $\equiv$ N)   | 2.895 | <b>NHIQ-sb</b>  | $\pi$ (Ph) $\cdots\pi$ (Ph)       | 3.789 |
|               | H45C $\cdots\pi$ (Ph)             | 2.619 |                 | $\pi$ (Ph) $\cdots\pi$ (Ph)       | 3.646 |
|               | $\pi$ (Ph) $\cdots\pi$ (Pyridine) | 3.581 |                 | $\pi$ (Ph) $\cdots\pi$ (Pyridine) | 3.742 |
|               | $\pi$ (Ph) $\cdots\pi$ (Pyridine) | 3.725 |                 | H13 $\cdots$ N2                   | 2.705 |
|               | N6-H6A $\cdots$ O2                | 1.881 |                 | H3 $\cdots$ O1                    | 1.712 |
|               | N2-H2A $\cdots$ O1                | 1.861 |                 | H20 $\cdots$ H10A                 | 2.647 |
|               | H7 $\cdots$ O2                    | 2.544 |                 |                                   |       |
|               | H26 $\cdots$ O1                   | 2.668 |                 |                                   |       |
|               | H9 $\cdots$ N8                    | 2.648 |                 |                                   |       |
|               | H28 $\cdots$ N8                   | 2.577 |                 |                                   |       |
| <b>AHIQ-r</b> | H11 $\cdots\pi$ (Ph)              | 3.446 | <b>AHIQ-o</b>   | H4 $\cdots\pi$ (Ph)               | 3.359 |
|               | H21 $\cdots\pi$ (Ph)              | 3.709 |                 | $\pi$ (Ph) $\cdots\pi$ (Ph)       | 4.193 |
|               | O1-H1 $\cdots$ N3                 | 1.720 |                 | O1-H1 $\cdots$ N3                 | 1.727 |
|               | H11B $\cdots$ O1                  | 2.474 |                 | H18 $\cdots$ H26                  | 2.392 |
|               | H2 $\cdots$ N2                    | 2.745 |                 | H10B $\cdots$ N2                  | 2.722 |
| <b>TPHIQ</b>  | $\pi$ (C=N) $\cdots\pi$ (C=N)     | 3.421 | H16 $\cdots$ N2 | 2.671                             |       |
|               | $\pi$ (Pyridine) $\cdots\pi$ (Ph) | 3.595 |                 |                                   |       |
|               | H10A $\cdots\pi$ (C $\equiv$ N)   | 2.771 |                 |                                   |       |
|               | N3-H3 $\cdots$ O1                 | 1.782 |                 |                                   |       |
|               | H10C $\cdots$ N2                  | 2.968 |                 |                                   |       |
|               | H18 $\cdots$ N2                   | 2.633 |                 |                                   |       |

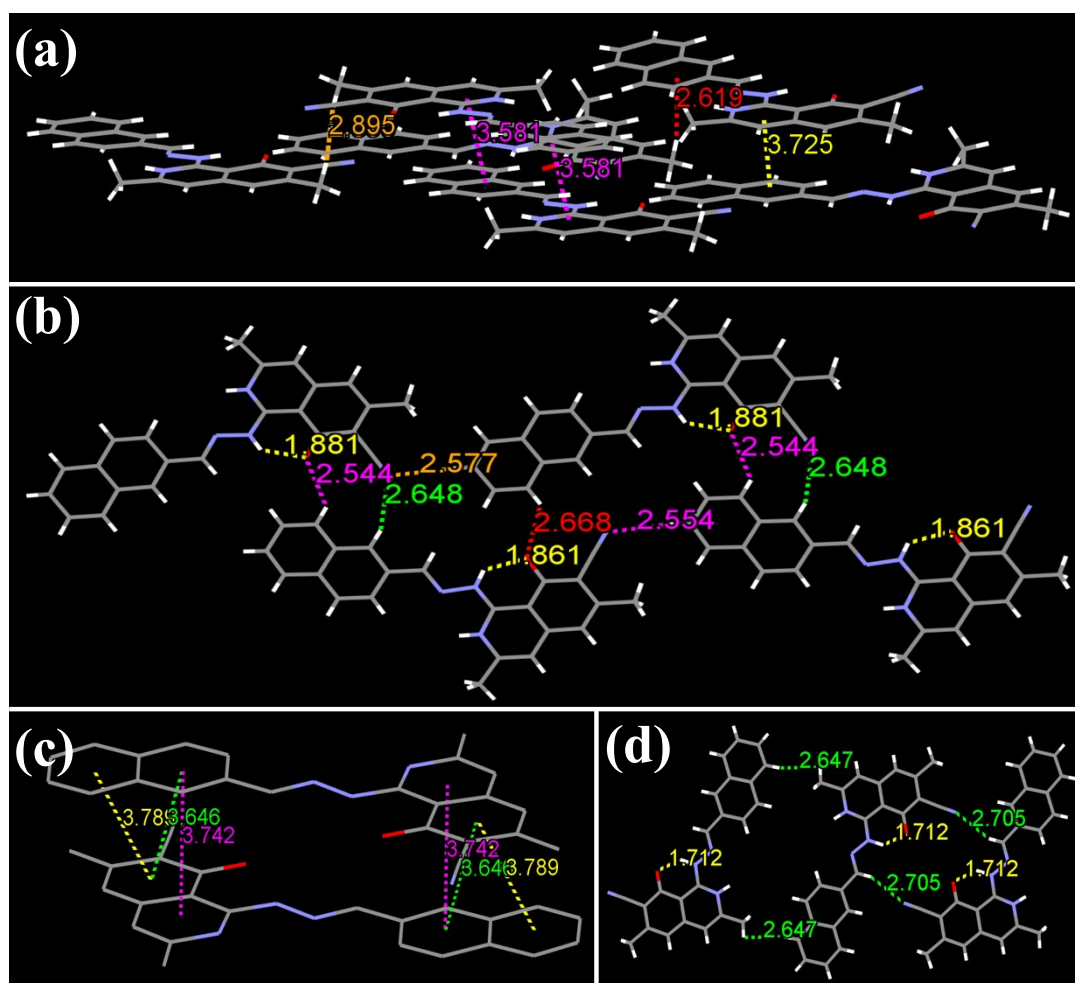

**Fig. S7** Intermolecular interactions in columns and interactions in horizontal direction in the single crystals of NHIQ-*g* (a,b) and NHIQ-*sb* (c,d).

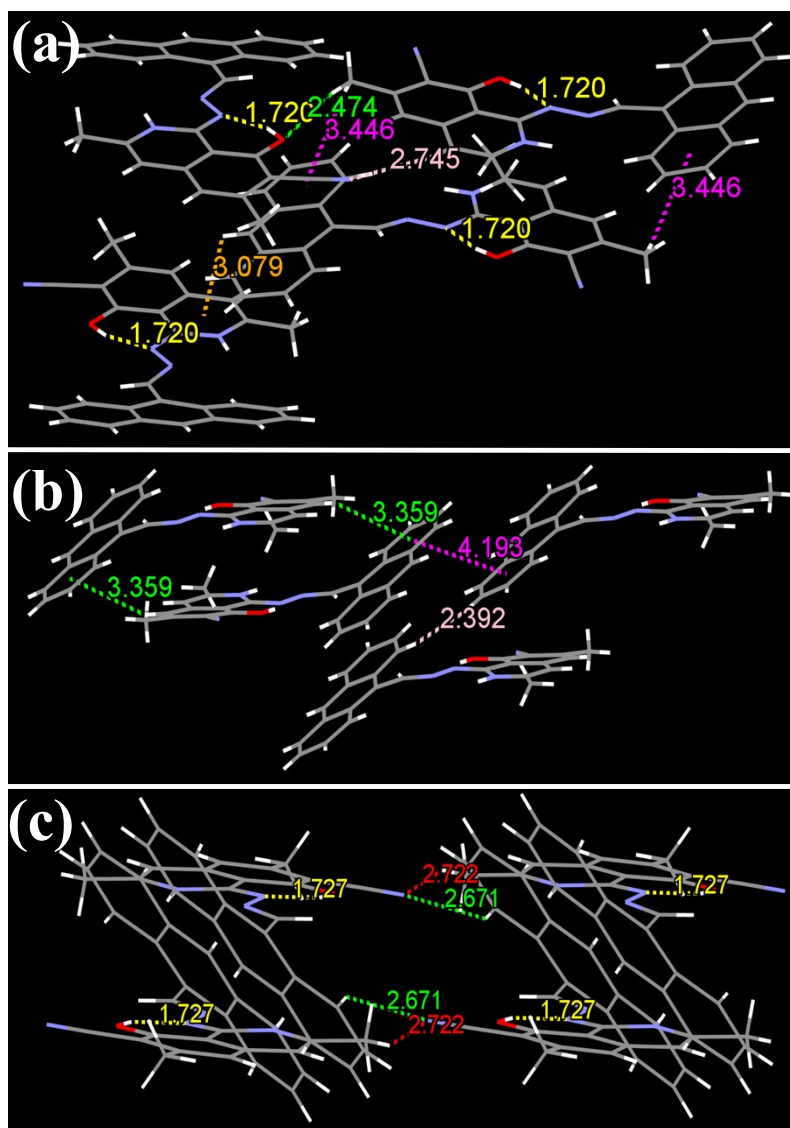

**Fig. S8** Intramolecular and intermolecular interactions in the single crystals of crystal **AHIQ-*r*** (a) and **AHIQ-*o*** (b,c).

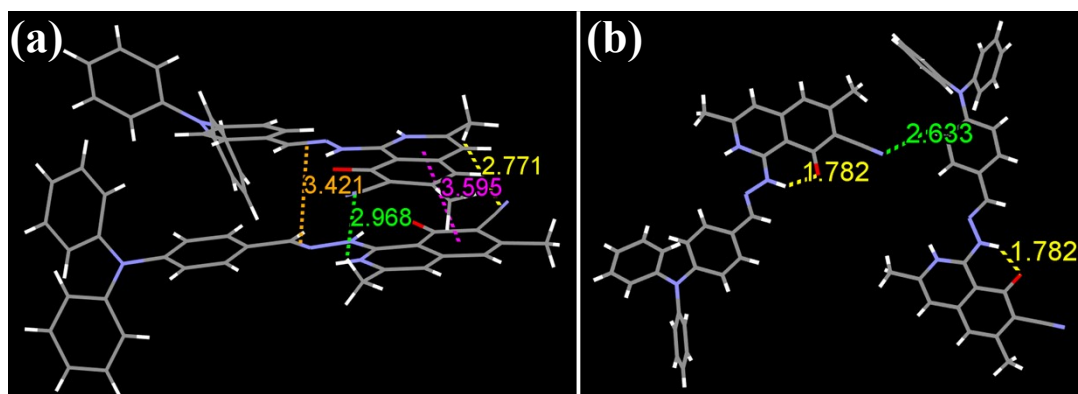

**Fig. S9** Single crystal **TPHIQ**: intramolecular and intermolecular interactions.

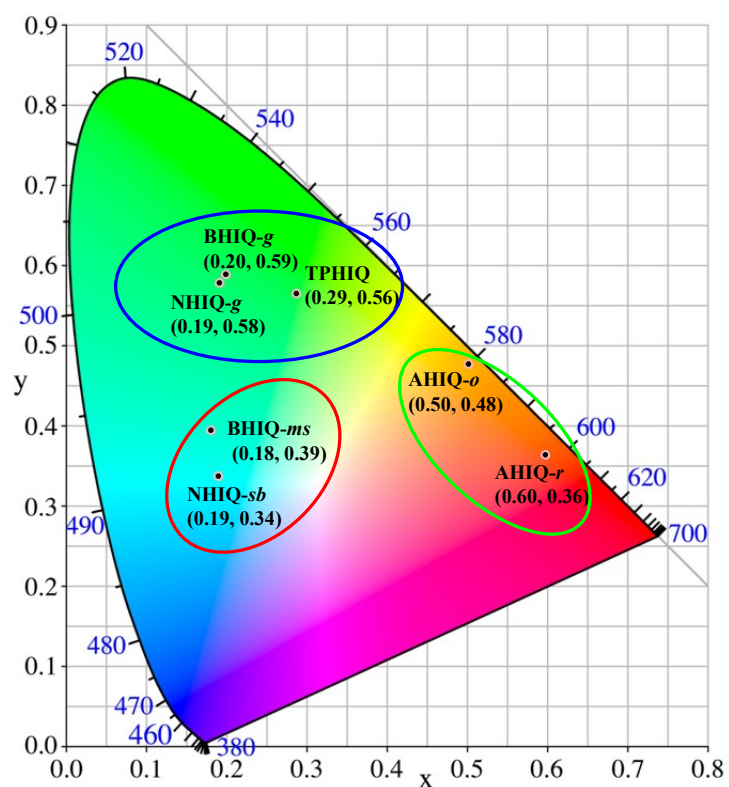

Fig. S10 CIE coordinates of the isoquinolinone-arylidenehydrazine derivatives in the crystalline state.

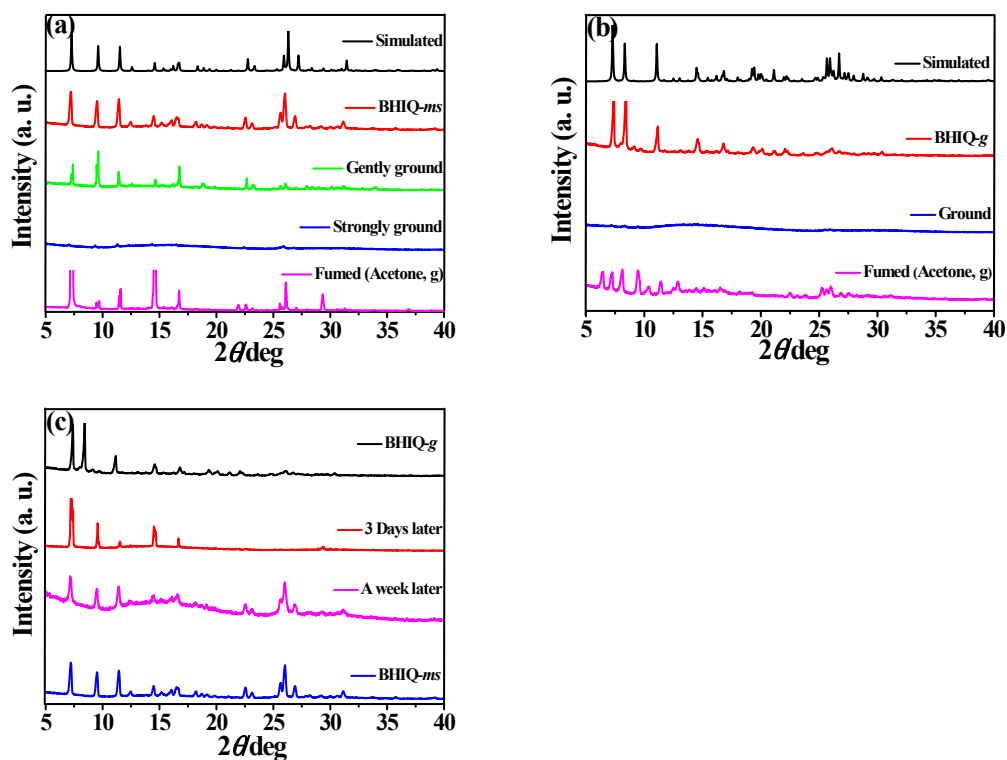

Fig. S11 XRD curves of **BHIQ-*ms*** (a) and **BHIQ-*g*** (b) under different conditions. (c) Change of XRD curves of **BHIQ-*g*** in natural environment.

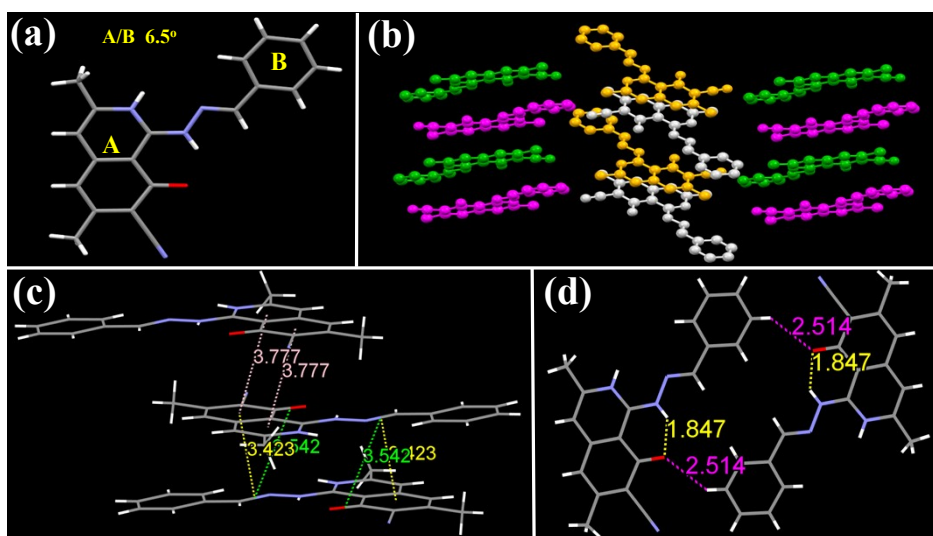

**Fig. S12** The single crystal **BHIQ-*ms*'** obtained from **BHIQ-*g*** a week later in natural environment: (a) single crystal structure; (b) stacking arrangement; (c) intermolecular interactions in a column; (d) interactions in horizontal direction.

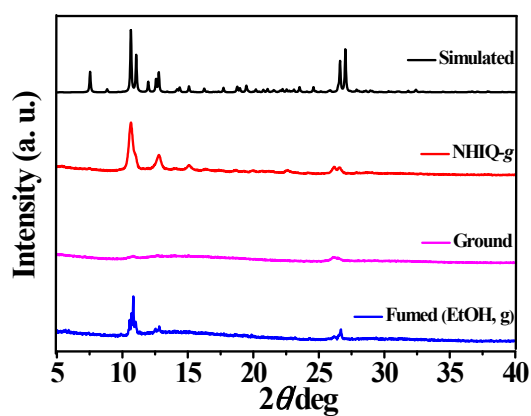

**Fig. S13** XRD curves of **NHIQ-*g*** under different conditions.

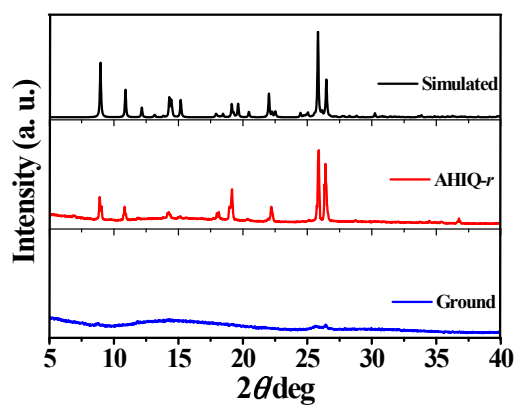

**Fig. S14** XRD curves of **AHIQ-*r*** under different conditions.

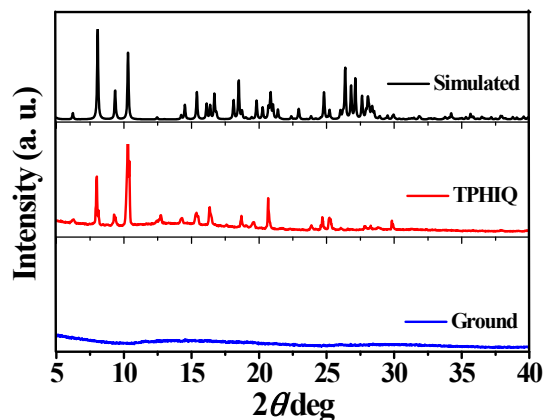

Fig. S15 XRD curves of TPHIQ under different conditions.

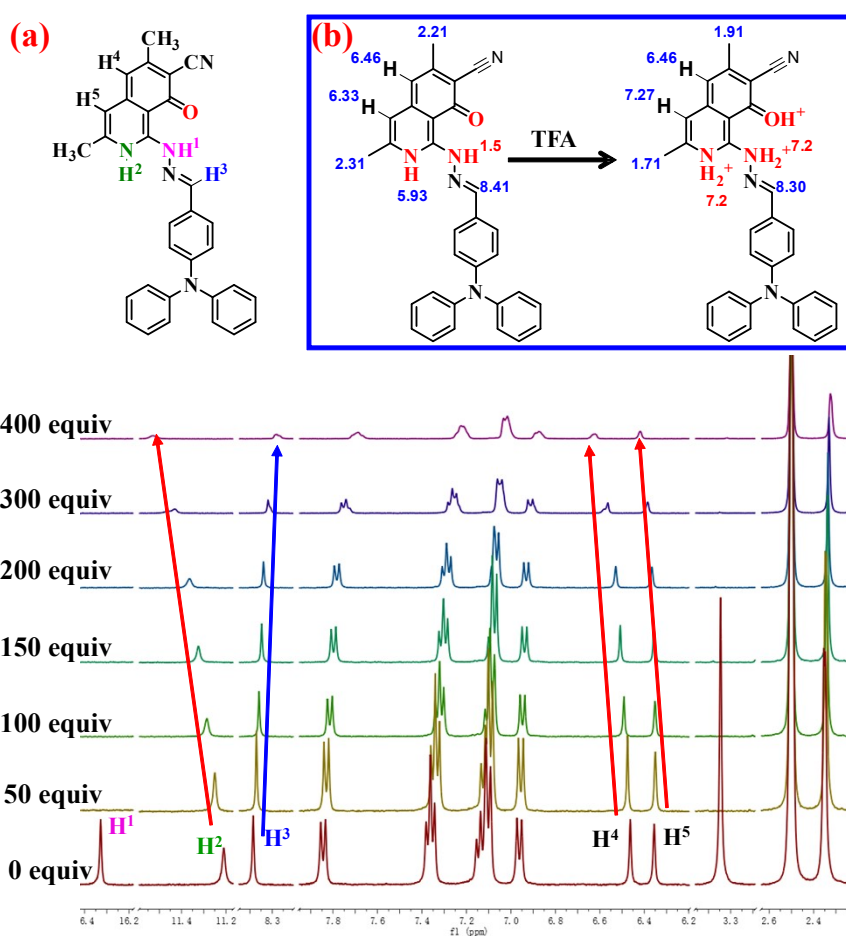

Fig. S16 (a)  $^1\text{H}$  NMR spectra of TPHIQ in  $\text{DMSO-}d_6$  with the addition of TFA. (b) Chemical shifts of protons of TPHIQ obtained from the simulation of ChemDraw software.

### 3. NMR spectra

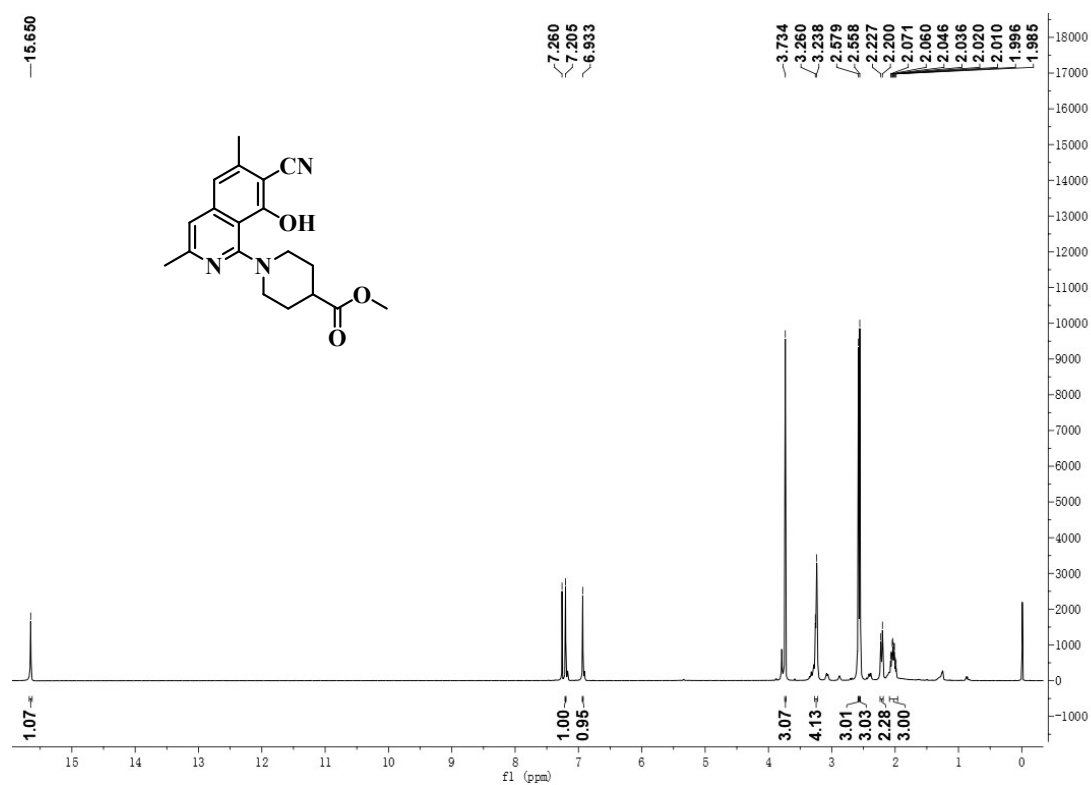

Fig. S17  $^1\text{H}$  NMR of compound 2 ( $\text{CDCl}_3$ , 500 MHz).

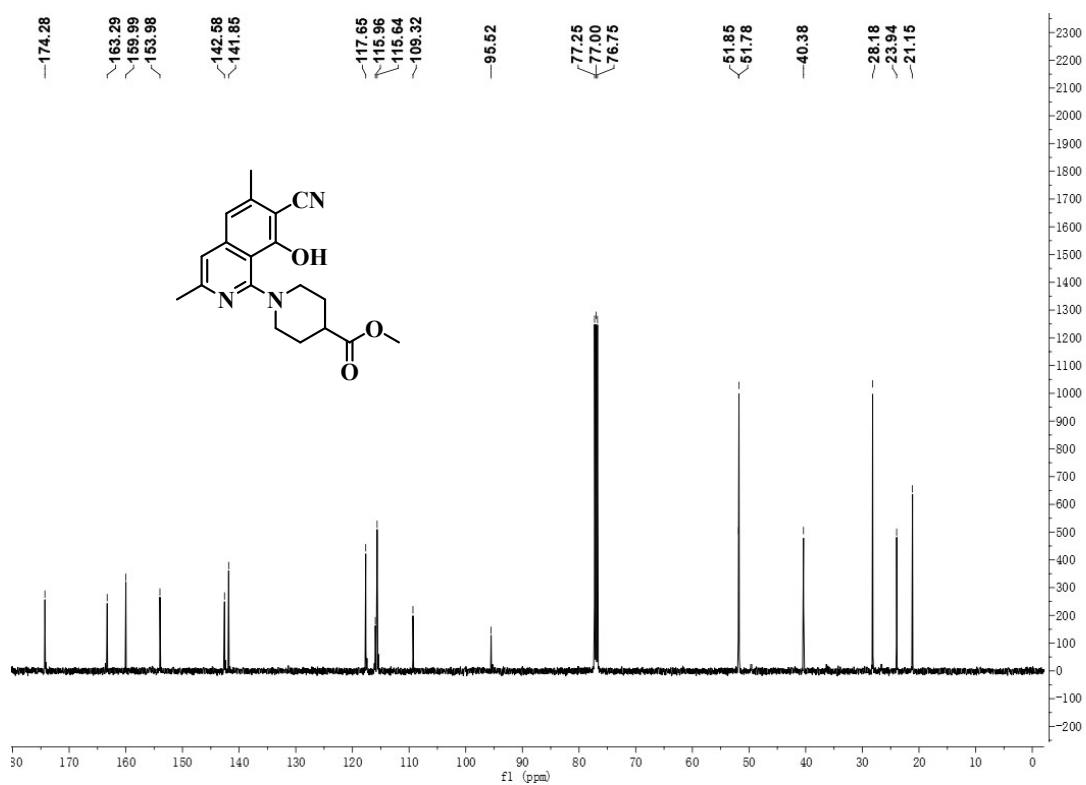

Fig. S18  $^{13}\text{C}$  NMR of compound 2 ( $\text{CDCl}_3$ , 125 MHz).



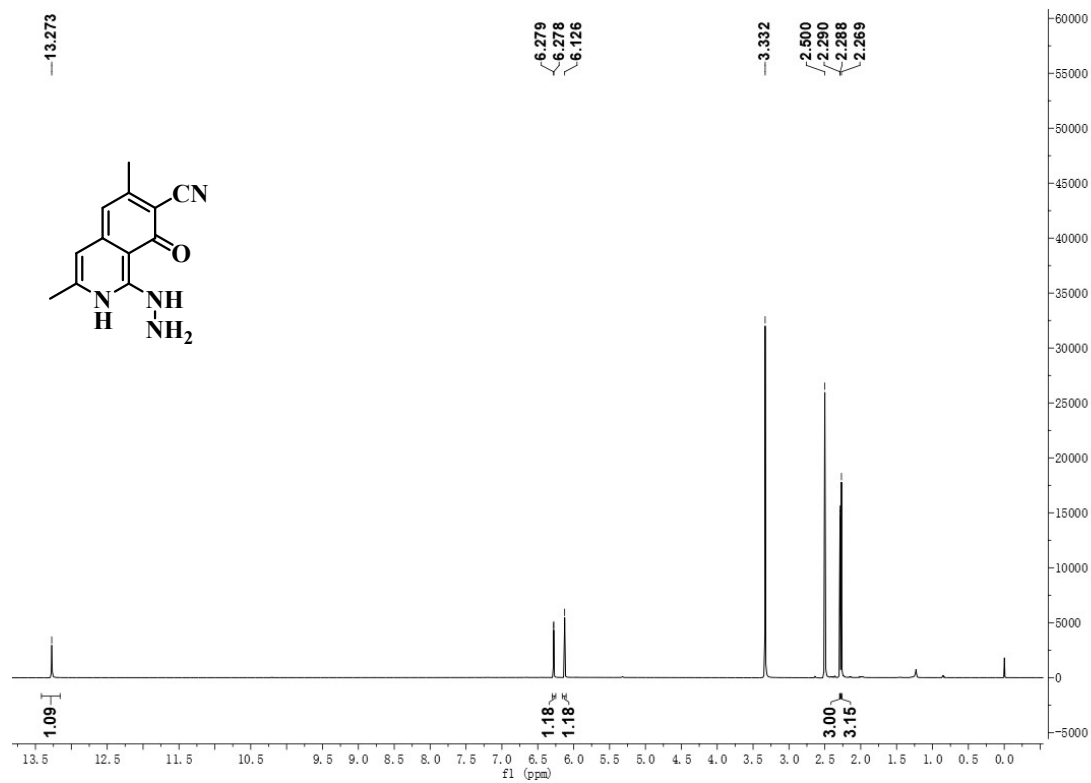

Fig. S19  $^1\text{H}$  NMR of compound 3 (DMSO- $d_6$ , 500 MHz).

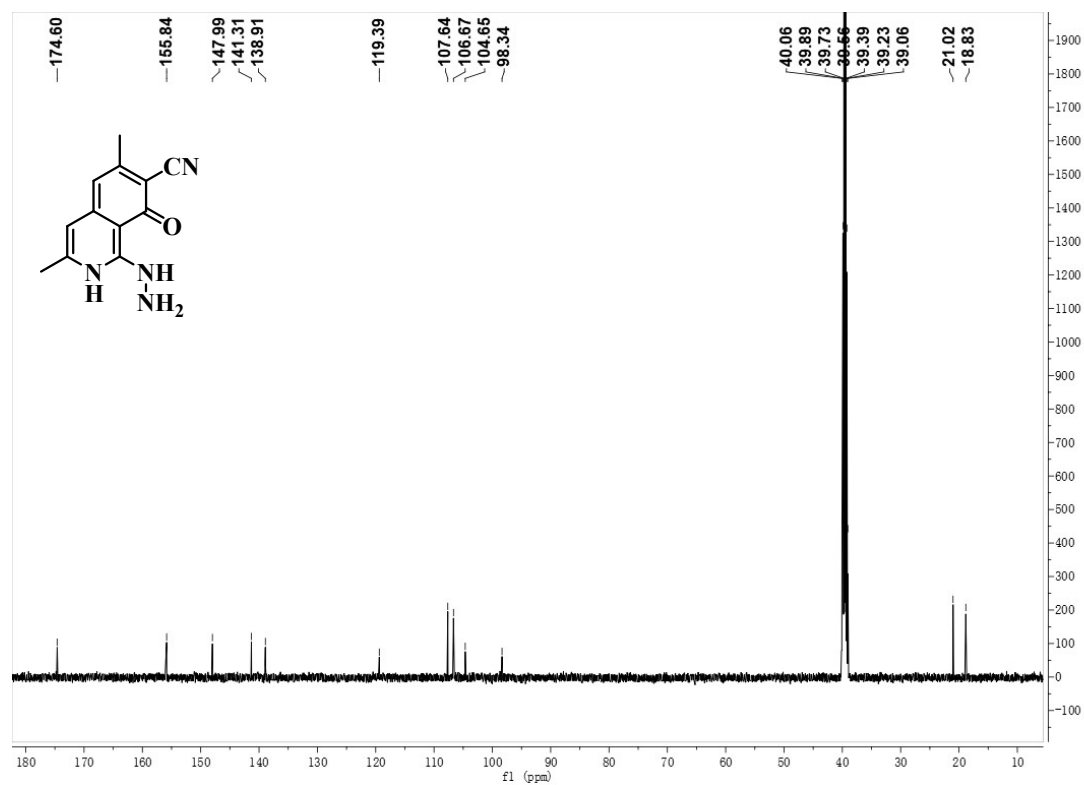

Fig. S20  $^{13}\text{C}$  NMR of compound 3 (DMSO- $d_6$ , 125 MHz).

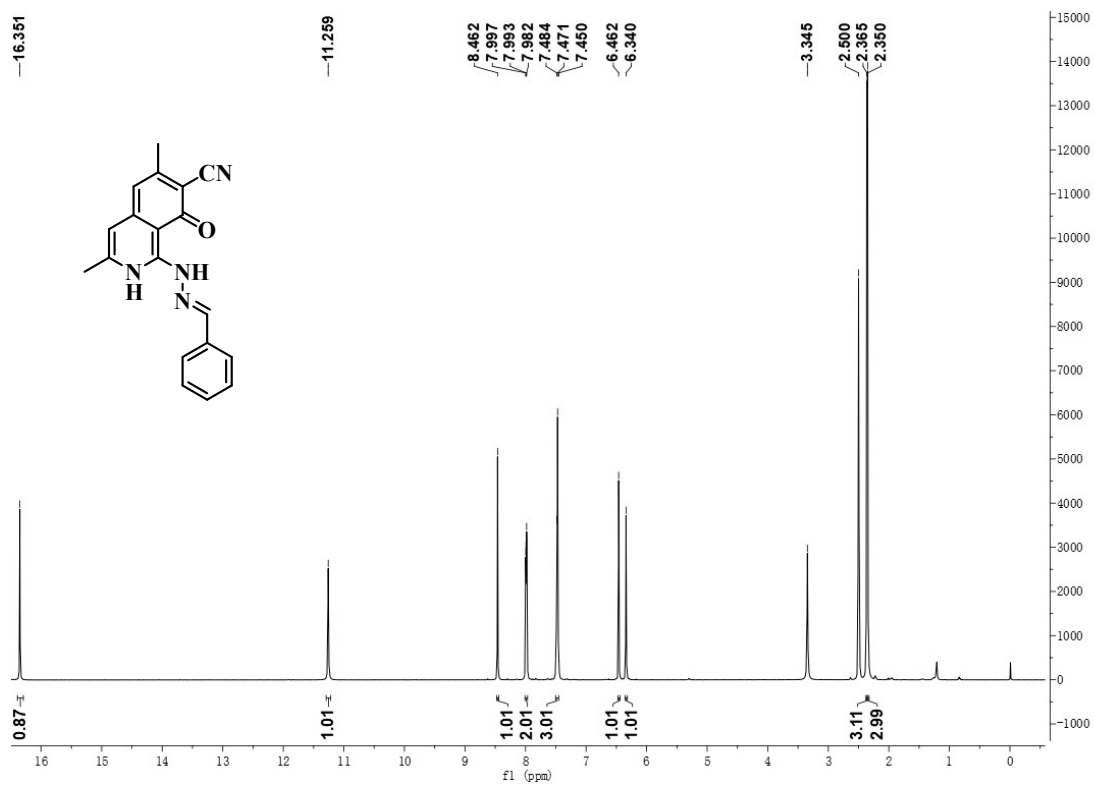

Fig. S21  $^1\text{H}$  NMR of BHIQ (DMSO- $d_6$ , 500 MHz).

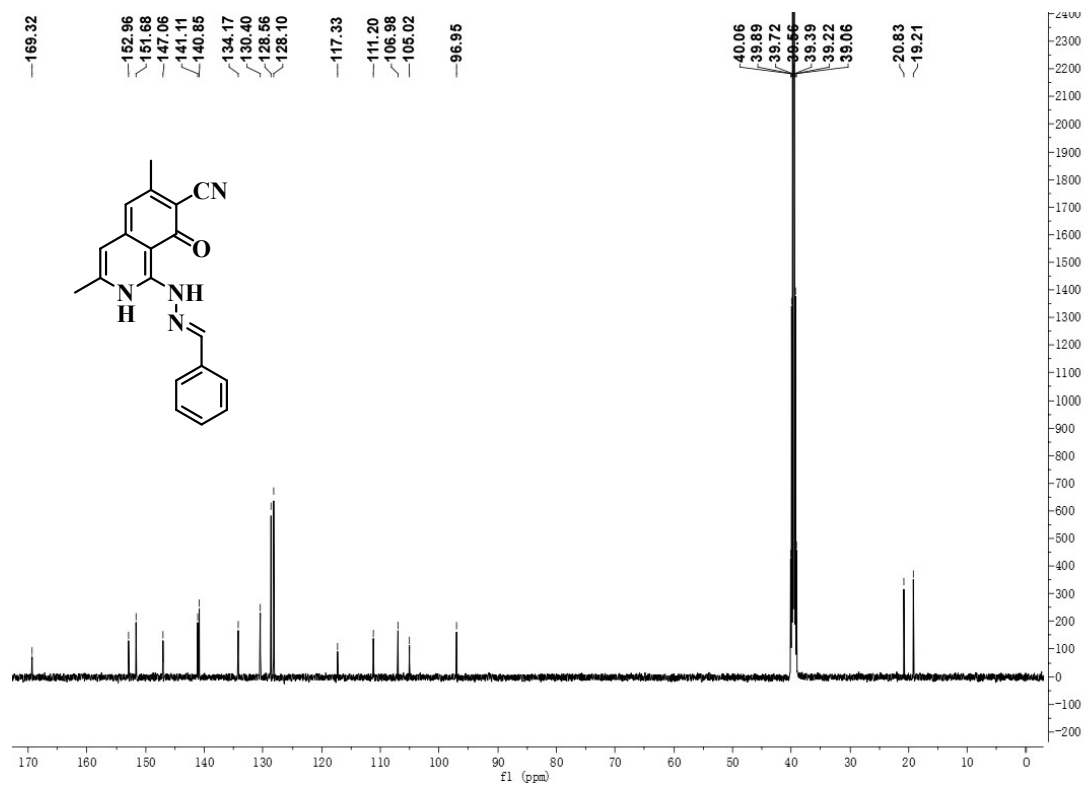

Fig. S22  $^{13}\text{C}$  NMR of BHIQ (DMSO- $d_6$ , 125 MHz).

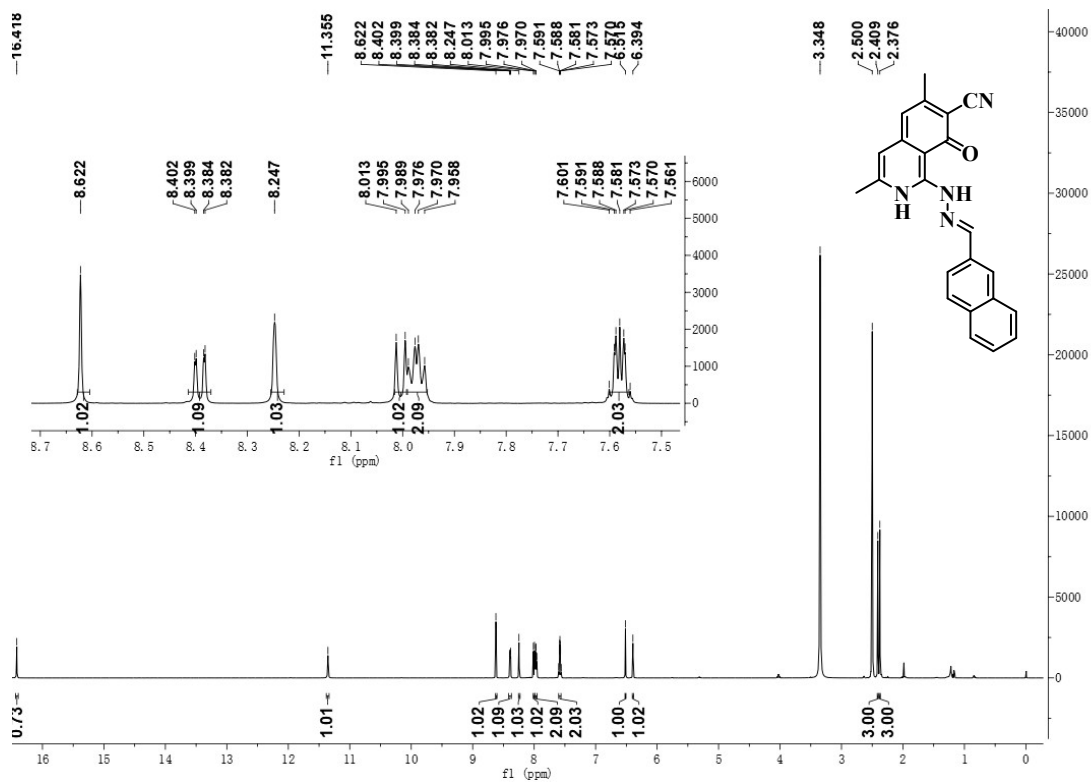

Fig. S23  $^1\text{H}$  NMR of NHIQ (DMSO- $d_6$ , 500 MHz).

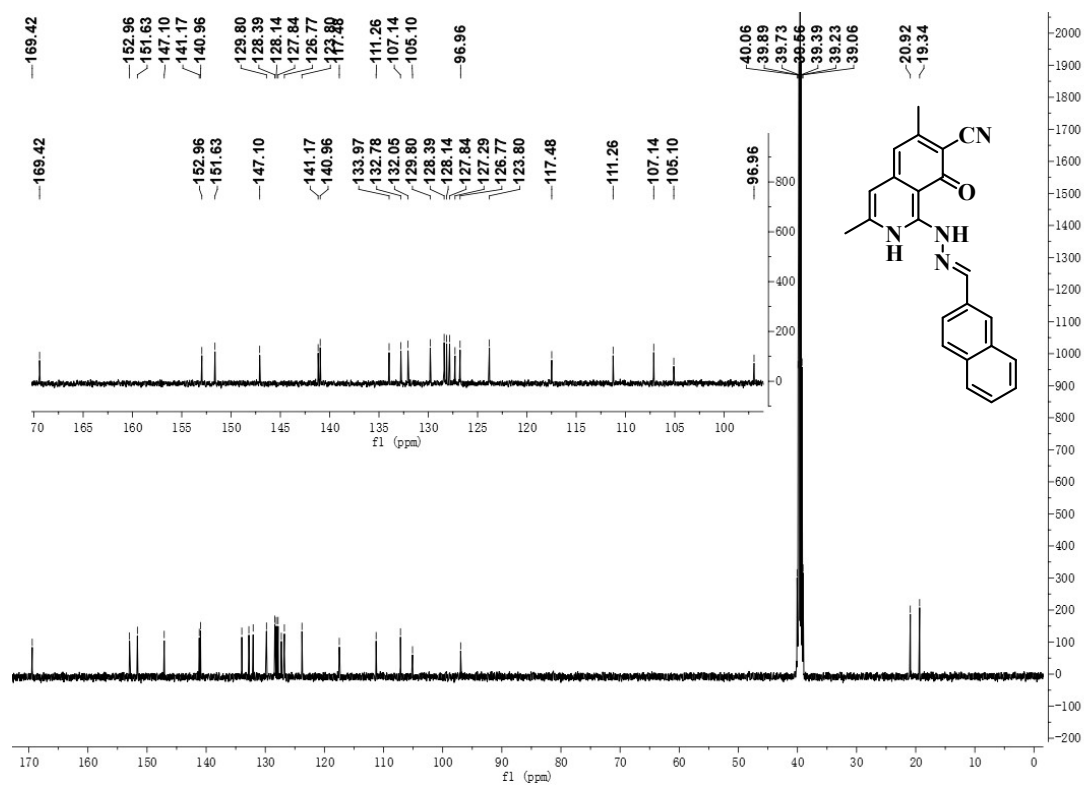

Fig. S24  $^{13}\text{C}$  NMR of NHIQ (DMSO- $d_6$ , 125 MHz).

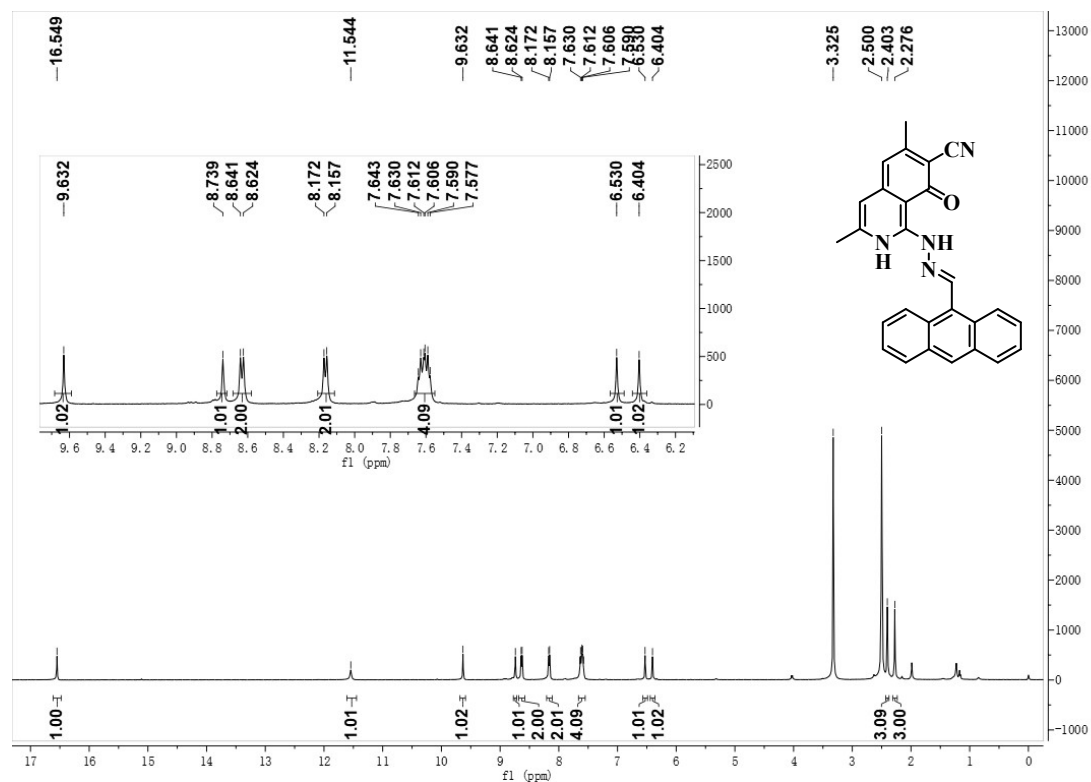

Fig. S25  $^1\text{H}$  NMR of AHIQ (DMSO- $d_6$ , 500 MHz).

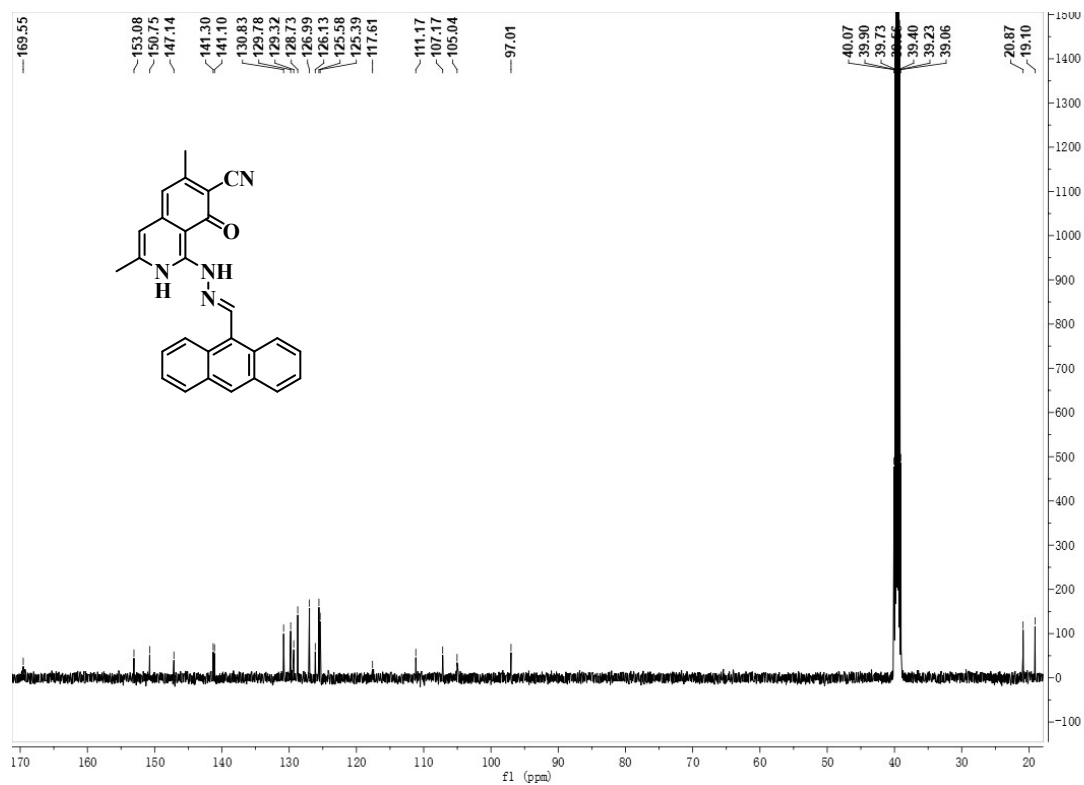

Fig. S26  $^{13}\text{C}$  NMR of AHIQ (DMSO- $d_6$ , 125 MHz).

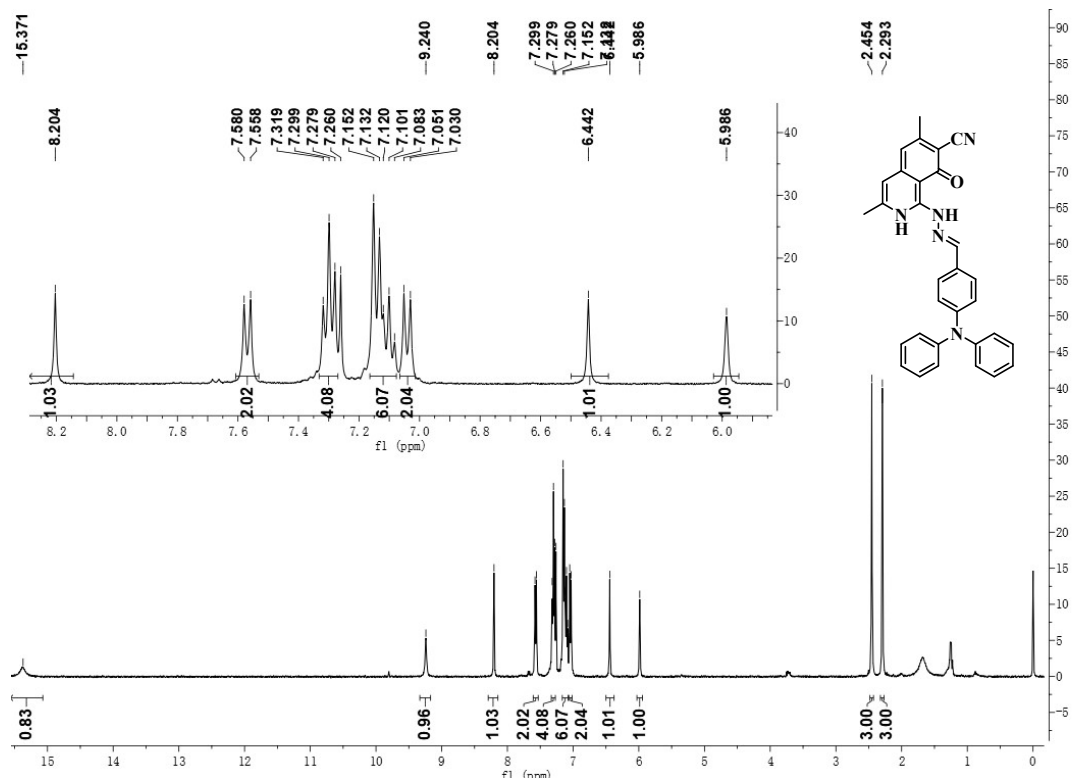

Fig. S27  $^1\text{H}$  NMR of TPIHQ ( $\text{CDCl}_3$ , 500 MHz).

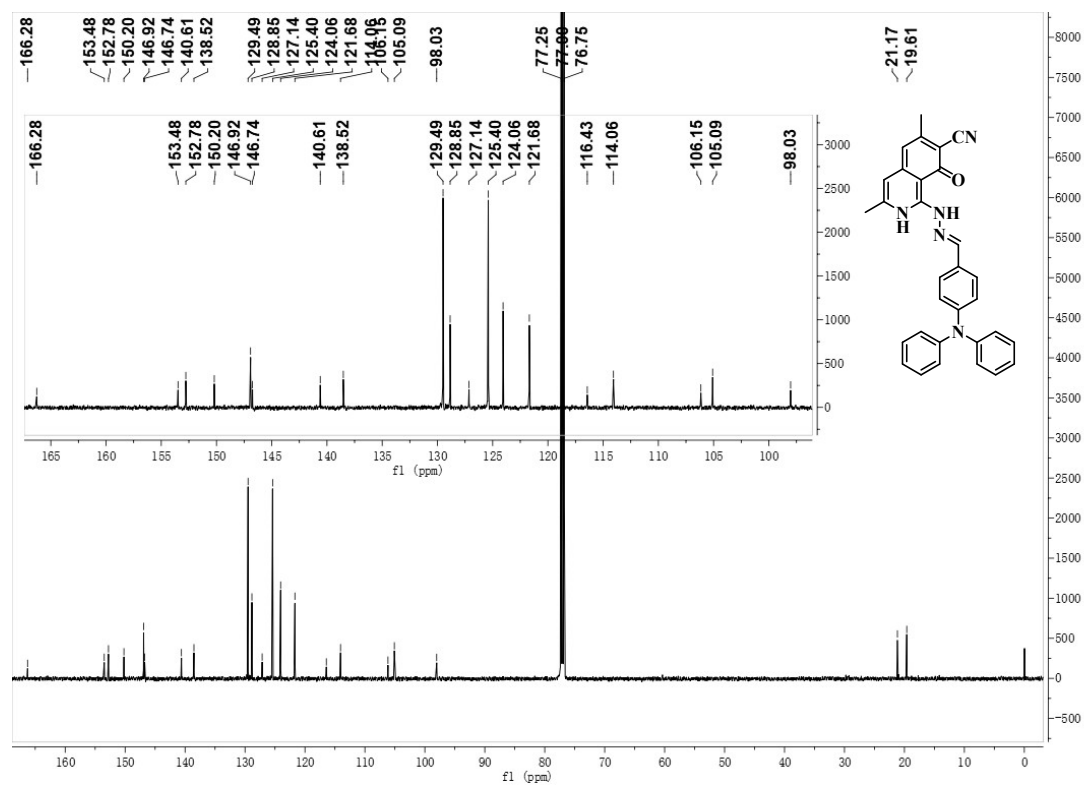

Fig. S28  $^{13}\text{C}$  NMR of TPIHQ ( $\text{CDCl}_3$ , 125 MHz).
